# Supplementary material for: Adolescent Health Literacy and Neighbourhood Features: HBSC Findings from Czech Republic, Poland, and Slovakia
Source: MDPI journal article supplement (doi:10.3390/ijerph18147388), 2021-07-10
Supplement: s1 [file s1]

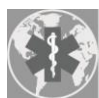

**Table S1.** Country specific GLMZ models.

| Variable                         | Czechia |       |       | Poland |       |       | Slovakia |       |       |
|----------------------------------|---------|-------|-------|--------|-------|-------|----------|-------|-------|
|                                  | B       | SE    | p     | B      | SE    | p     | B        | SE    | p     |
| Const.                           | 28.633  | 1.051 | 0     | 23.085 | 1.099 | 0     | 29.75    | 1.83  | 0     |
| 1. Gender (female ref.)          | −0.543  | 0.147 | 0     | −0.934 | 0.154 | 0     | −0.687   | 0.232 | 0.003 |
| 2. Age                           | 0.02    | 0.07  | 0.777 | 0.42   | 0.074 | 0     | 0        | 0.122 | 0.998 |
| 3. FAS (0–13)                    | 0.159   | 0.031 | 0     | 0.216  | 0.035 | 0     | 0.204    | 0.052 | 0     |
| 4. Social features (z-score)     | 0.912   | 0.262 | 0     | 1.175  | 0.28  | 0     | 0.829    | 0.409 | 0.043 |
| 5. Structural features (z-score) | 0.829   | 0.295 | 0.005 | −0.524 | 0.275 | 0.057 | 0.531    | 0.383 | 0.166 |
| 2-way interactions               |         |       |       |        |       |       |          |       |       |
| 3*4                              | 0.008   | 0.031 | 0.79  | −0.032 | 0.034 | 0.348 | 0.041    | 0.05  | 0.407 |
| 3*5                              | −0.051  | 0.034 | 0.14  | 0.063  | 0.033 | 0.056 | −0.01    | 0.047 | 0.826 |
| 4*5                              | 0.446   | 0.068 | 0     | 0.177  | 0.074 | 0.016 | 0.06     | 0.098 | 0.539 |
| (Scale)                          | 32.524  | 0.585 |       | 19.036 | 0.471 |       | 24.138   | 0.797 |       |
